# Supplementary material for: Wogonin Inhibits Cardiac Hypertrophy by Activating Nrf-2-Mediated Antioxidant Responses
Source: Cardiovasc Ther. 2021 Jul 1;2021:9995342. doi: 10.1155/2021/9995342 (PMC8266446; doi:10.1155/2021/9995342)
Supplement: Supplementary Materials — As shown in supplementary Figure 1, Wog prevented AngII-induced hypertrophy and oxidative stress in NRCMs. [file 9995342.f1.zip]

Archive with 2 entries (2 files):
- Supplementary Fig. 1.pptx
- Supplementary Figure-Wog (2).docx
